# Supplementary material
Source: publisher figshare collection journal article supplement (https://gsapubs.figshare.com/ndownloader/files/28042086)
Supplement: Supplementary file 1 [file 28042086]

## Sheet: Sheet1
Zircon Supplemental Table. U-Pb geochronologic analyses.
						Isotope ratios						Apparent ages (Ma)
Analysis	U	206Pb	U/Th	206Pb*	±	207Pb*	±	206Pb*	±	error		206Pb*	±	207Pb*	±	206Pb*	±	Best age	±	Excl.*
	(ppm)	204Pb		207Pb*	(%)	235U*	(%)	238U	(%)	corr.		238U*	(Ma)	235U	(Ma)	207Pb*	(Ma)	(Ma)	(Ma)
Sample H14-82: Foliated granite (40.99429082, -114.61275903, 2005 m)
Spot 15	428.503	243.048	2.09061	14.4891	3.23922	0.0158251	678.892	0.0222615	1.12247	0.00165339		141.933	1.57575	15.9427	107.792	NA	NA	141.933	1.57575	1
Spot 20	388	586.397	2.6143	16.2727	2.58202	0.119328	37.551	0.0238241	0.798472	0.0212637		151.779	1.19776	114.462	40.6694	NA	NA	151.779	1.19776	1
Spot 9	927.518	3348.66	2.8112	18.4141	2.05117	0.165981	6.53625	0.0239144	0.807854	0.123596		152.347	1.21632	155.925	9.44794	211.624	150.439	152.347	1.21632
Spot 2	631.117	2518.75	5.16246	18.5483	2.38618	0.161372	11.904	0.0240437	0.82991	0.0697171		153.162	1.25612	151.903	16.7965	133.333	NA	153.162	1.25612
Spot 25	329.386	1278.47	1.9311	15.4659	3.16748	0.180332	19.9141	0.0243173	0.788984	0.0396193		154.884	1.20745	168.347	30.9026	362.995	NA	154.884	1.20745
Spot 8	477.132	1582.47	2.36692	17.8158	2.01952	0.158644	4.92695	0.0243382	0.702659	0.142615		155.015	1.07624	149.515	6.84995	64.1697	NA	155.015	1.07624
Spot 19	455.4	1646.82	2.61694	17.0339	2.24705	0.169313	4.69487	0.0244384	0.649891	0.138426		155.646	0.999413	158.822	6.9027	207.472	107.861	155.646	0.999413
Spot 10	172.655	718.347	2.49686	13.3795	4.01214	0.184884	26.002	0.0244477	1.11979	0.0430653		155.704	1.72266	172.254	41.2191	406.979	NA	155.704	1.72266
Spot 24	368.881	1508.58	2.64458	16.1903	2.50086	0.177759	6.575	0.024466	0.704607	0.107164		155.819	1.08475	166.13	10.0766	316.644	148.785	155.819	1.08475
Spot 1	332.121	1299.04	2.32682	15.0991	2.8658	0.188048	14.4805	0.0244917	0.677756	0.0468047		155.981	1.04448	174.962	23.2769	440.831	323.292	155.981	1.04448
Spot 18	710.709	2363.85	3.41305	18.0438	1.99339	0.167962	7.81485	0.0244956	0.67297	0.0861143		156.006	1.03727	157.649	11.4118	183.411	181.588	156.006	1.03727
Spot 7	1182.84	4362.47	4.4616	18.9836	1.28256	0.168348	5.09654	0.0245253	0.933857	0.183233		156.192	1.44108	157.985	7.45676	185.935	116.707	156.192	1.44108
Spot 6	416.912	1686.01	2.56443	16.2921	3.11037	0.179916	8.407	0.0245268	0.78434	0.0932961		156.202	1.21043	167.988	13.0171	338.387	189.885	156.202	1.21043
Spot 17	505.211	1934.56	3.12335	17.0537	2.55751	0.175439	8.24216	0.0246568	0.772954	0.0937806		157.02	1.19903	164.129	12.4916	268.91	188.445	157.02	1.19903
Spot 14	2446.05	8200.54	5.56748	20.0348	0.810948	0.165607	3.63916	0.0246935	0.661105	0.181664		157.251	1.02701	155.599	5.25002	131.56	84.1859	157.251	1.02701
Spot 3	1399.17	4478.96	3.96589	19.489	1.08898	0.167856	4.1585	0.025063	0.618268	0.148676		159.575	0.974488	157.556	6.06903	128.361	96.7872	159.575	0.974488	2
Spot 16	299.279	1084.29	2.78706	16.2445	2.82838	0.167737	15.2099	0.0250896	0.998849	0.0656708		159.743	1.57598	157.453	22.1876	124.141	NA	159.743	1.57598	2
Spot 4	307.076	1235.08	2.87543	16.2879	2.32104	0.17382	18.8765	0.0252303	0.913078	0.0483712		160.627	1.44853	162.729	28.3898	194.459	NA	160.627	1.44853	2
Spot 5	1733	4847.08	3.69063	19.3741	0.929021	0.172702	4.26451	0.025536	0.681992	0.159923		162.549	1.09471	161.761	6.37697	151.271	98.6736	162.549	1.09471	2
*Analyses excluded from weighted mean calculation (1, dicordant; 2, age older than main population)																Weighted mean age: 155.6 ± 0.8 Ma (n=13)
																MSWD : 1.4
Laser ablation multicollector inductively coupled plasma mass spectrometry (LA-MC-ICPMS) analyses conducted at the Arizona LaserChron Center.
Lab notes below:
1. Analyses with >10% uncertainty (1-sigma) in 206Pb/238U age are not included.
2. Analyses with >10% uncertainty (1-sigma) in 206Pb/207Pb age are not included, unless 206Pb/238U age is <500 Ma.
3. Best age is determined from 206Pb/238U age for analyses with 206Pb/238U age <1000 Ma and from 206Pb/207Pb age for analyses with 206Pb/238Uage > 1000 Ma.
4. Concordance is based on 206Pb/238U age / 206Pb/207Pb age. Value is not reported for 206Pb/238U ages <500 Ma because of large uncertainty in 206Pb/207Pb age.
5. Analyses with 206Pb/238U age > 500 Ma and with >20% discordance (<80% concordance) are not included.
6. Analyses with 206Pb/238U age > 500 Ma and with >5% reverse discordance (<105% concordance) are not included.
7. All uncertainties are reported at the 1-sigma level, and include only measurement errors.
8. Systematic errors are as follows (at 2-sigma level): [sample 1: 2.5% (206Pb/238U) & 1.4% (206Pb/207Pb)] These values are reported on cells U1 and W1 of NUagecalc.
9. Analyses conducted by LA-MC-ICPMS, as described by Gehrels et al. (2008).
10. U concentration and U/Th are calibrated relative to Sri Lanka zircon standard and are accurate to ~20%.
11. Common Pb correction is from measured 204Pb with common Pb composition interpreted from Stacey and Kramers (1975).
12. Common Pb composition assigned uncertainties of 1.5 for 206Pb/204Pb, 0.3 for 207Pb/204Pb, and 2.0 for 208Pb/204Pb.
13. U/Pb and 206Pb/207Pb fractionation is calibrated relative to fragments of a large Sri Lanka zircon of 563.5 ± 3.2 Ma (2-sigma).
14. U decay constants and composition as follows: 235U = 9.8485 x 10-10, 238U = 1.55125 x 10-10, 238U/235U = 137.88.
15. Weighted mean and concordia plots determined with Isoplot (Ludwig, 2008).
